# Supplementary material for: Peer-support interventions for women with cardiovascular disease: protocol for synthesising the literature using an evidence map
Source: HighWire-hosted journal article supplement (doi:10.1136/bmjopen-2022-067812), 2022-10-01
Supplement: bmjopen-2022-067812supp002_data_supplement.pdf [file bmjopen-2022-067812supp002_data_supplement.pdf]

**Supplemental Table 2** GRIPP2 Long Form.

| Section and topic                                      | Checklist item                                                                                    | Included |
|--------------------------------------------------------|---------------------------------------------------------------------------------------------------|----------|
| <b>Section 1: Abstract of paper</b>                    |                                                                                                   |          |
| 1a: Aim                                                | Report aims of study                                                                              |          |
| 1b: Methods                                            | Describe methods used by which patients/public involved                                           | Yes      |
| 1c: Results                                            | Report impacts and outcomes of PPI in study                                                       | N/A      |
| 1d: Conclusions                                        | Summarize main conclusions of study                                                               | N/A      |
| 1e: Keywords                                           | Include PPI or alternative terms as keywords                                                      | Yes      |
| <b>Section 2: Background to paper</b>                  |                                                                                                   |          |
| 2a: Definition                                         | Report definition of PPI used and how it links to comparable studies                              | Yes      |
| 2b: Theoretical underpinnings                          | Report theoretical rationale and influences of PPI                                                | Yes      |
| 2c: Concepts and theory development                    | Report any conceptual models or influences used                                                   | Yes      |
| <b>Section 3: Aims of paper</b>                        |                                                                                                   |          |
| 3: Aim                                                 | Report aims of study                                                                              | Yes      |
| <b>Section 4: Methods of paper</b>                     |                                                                                                   |          |
| 4a: Design                                             | Describe methods by which patients involved                                                       | Yes      |
| 4b: People involved                                    | Describe patients involved with PPI activity in study                                             | Yes      |
| 4c: Stages of involvement                              | Report on how PPI used at different stages of study                                               | Yes      |
| 4d: Level or nature of involvement                     | Report level or nature of PPI used at various stages                                              | Yes      |
| <b>Section 5: Capture or measurement of PPI impact</b> |                                                                                                   |          |
| 5a: Qualitative evidence of impact                     | Report methods to qualitatively explore impact of PPI                                             | N/A      |
| 5b: Quantitative evidence of impact                    | Report methods to quantitatively measure impact of PPI                                            | N/A      |
| 5c: Robustness of measure                              | Report rigour of method used to capture impact of PPI                                             | N/A      |
| <b>Section 6: Economic assessment</b>                  |                                                                                                   |          |
| 6: Economic assessment                                 | Report method used for economic assessment of PPI                                                 | N/A      |
| <b>Section 7: Study results</b>                        |                                                                                                   |          |
| 7a: Outcomes of PPI                                    | Report results of PPI, including positive and negative outcomes                                   | N/A      |
| 7b: Impacts of PPI                                     | Report positive and negative impacts PPI had on research, individuals involved, and wider impacts | N/A      |
| 7c: Context of PPI                                     | Report contextual factors the enabled or hindered the process of impact of PPI                    | N/A      |
| 7d: Process of PPI                                     | Report process factors that enabled or hindered PPI                                               | N/A      |
| 7ei: Theory development                                | Report any theory development in PPI that emerged                                                 | N/A      |
| 7eii: Theory development                               | Report testing of theoretical models, if any                                                      | N/A      |
| 7f: Measurement                                        | Report instrument development and testing                                                         | N/A      |
| 7g: Economic assessment                                | Report costs or benefits of PPI                                                                   | N/A      |
| <b>Section 8: Discussion and conclusion</b>            |                                                                                                   |          |
| 8a: Outcomes                                           | Comment on how PPI influenced overall study                                                       | N/A      |
| 8b: Impacts                                            | Comment on impacts of PPI and how they contribute to new knowledge                                | N/A      |
| 8c: Definition                                         | Comment on definition of PPI used and report any suggested changes                                | N/A      |
| 8d: Theoretical underpinnings                          | Comment on study's contribution to theory development of PPI                                      | N/A      |
| 8e: Context                                            | Comment on how context factors influenced PPI                                                     | N/A      |
| 8f: Process                                            | Comment on how process factors influenced PPI                                                     | N/A      |
| 8g: Measurement/capture of PPI impact                  | Comment on how well PPI impact was evaluated                                                      | N/A      |
| 8h: Economic assessment                                | Discuss economic costs or benefits of PPI                                                         | N/A      |
| 8i: Reflections/critical perspective                   | Reflect on what went well and what did not go well                                                | N/A      |

PPI=patient and public involvement
